# Supplementary material for: Dietary fatty acid patterns and risk of oesophageal squamous cell carcinoma
Source: PeerJ. 2022 Mar 31;10:e13036. doi: 10.7717/peerj.13036 (PMC8977065; doi:10.7717/peerj.13036)
Supplement: Supplemental Information 2 [file peerj-10-13036-s005.xlsx]

## Sheet: Sheet1
variable	code
group	0:cnotrol 1:case
sex1	1:Male 2:Female
age1(years)	1:≤54 2:＞54
marriage1	1:Married 2:Other
education1	1:Low 2:High
work1	1:Farmer and worker 2:Other
income1(RMB/monthly)	1:<2000 2:≥2000
smoking1	0:No 1:Yes
drinking1	0:No 1:Yes
tea1	0:No 1:Yes
tumor1	0:No 1:Yes
grain(times/weekly)	1:＜1 2:1-2 3:3-4 4:5-7
saltfold(times/weekly)	1:＜1 2:1-2 3:3-4 4:5-7
friedfood(times/weekly)	1:＜1 2:1-2 3:3-4 4:5-7
fruit(times/weekly)	1:＜1 2:1-2 3:3-4 4:5-7
vegetable(times/weekly)	1:＜1 2:1-2 3:3-4 4:5-7
garlic(times/weekly)	1:＜1 2:1-2 3:3-4 4:5-7
Hot food	0:No 1:Yes
Hard food	0:No 1:Yes
